# Supplementary material
Source: ML conference proceedings conference paper supplement (https://openreview.net/forum?id=w63aCqNRFp)
Supplement: supplementary_material [file attachment]

## A FORECASTING MODEL FOR DETECTING ANOMALIES

In this section, we describe detailed a time-series forecasting model specialized for anomaly detection. For convenience of understanding, notations are defined as follows:

- Observed time-series  $\mathbf{T} \in \mathbb{R}^{(c+d) \times N}$  is denoted by a set of time points  $\{T_1, T_2, \dots, T_N\}$ .
- The observed value at time  $t$ ,  $T_t \in \mathbb{R}^{c+d}$  contains  $c$  continuous columns and  $d$  discrete columns. It is expressed as  $T_t = \{\mathbf{C}^t, \mathbf{D}^t\}$  at time  $t$ .
- $\mathbf{C}^t \in \mathbb{R}^c$  is denoted by a set of columns with a continuous value  $\{C_1, C_2, \dots, C_c\}^t$  at time  $t$ .
- $\mathbf{D}^t \in \mathbb{R}^d$  is denoted by a set of columns with a discrete value  $\{D_1, D_2, \dots, D_d\}^t$  at time  $t$ .

### A.1 EXTRACT CONTINUOUS & DISCRETE FEATURES.

First, continuous and discrete features are separately extracted for prediction according to the data characteristics. Therefore, we divide continuous and discrete values for observed values  $\{T_t\}_{t=1}^N \in \mathbb{R}^{(c+d) \times N}$  as follows:

$$\begin{aligned} \{T_t\}_{t=1}^N &= \{\mathbf{C}^t, \mathbf{D}^t\}_{t=1}^N, \\ &= \{\mathbf{C}^t\}_{t=1}^N, \{\mathbf{D}^t\}_{t=1}^N. \end{aligned} \quad (2)$$

Then, in time-series prediction, the model considering trend and seasonality shows simple but excellent performance (Zeng et al., 2023), so we decompose continuous values into trend and seasonality. To extract the trend  $\mathbf{C}_T$  from the continuous values, we use the moving average method, and the seasonality  $\mathbf{C}_S$  is taken as the remaining value after subtracting the trend from the continuous values.

$$\begin{aligned} \{\mathbf{C}_T^t\}_{t=1}^N &= \text{AvgPool}(\text{Padding}(\{\mathbf{C}^t\}_{t=1}^N)), \\ \{\mathbf{C}_S^t\}_{t=1}^N &= \{\mathbf{C}^t\}_{t=1}^N - \{\mathbf{C}_T^t\}_{t=1}^N, \end{aligned} \quad (3)$$

where AvgPool means average pooling and Padding means pre-padding with the first value and post-padding with the last value. Then, using each component as input to a linear layer, each hidden vector is extracted as follows:

$$\begin{aligned} \hat{\mathbf{C}}_T^{N+1} &= \text{Linear}_{trend}(\{\mathbf{C}_T^t\}_{t=1}^N), \\ \hat{\mathbf{C}}_S^{N+1} &= \text{Linear}_{seasonality}(\{\mathbf{C}_S^t\}_{t=1}^N), \end{aligned} \quad (4)$$

where  $\text{Linear}_{trend}$  and  $\text{Linear}_{seasonality}$  are linear layers that predict the next time point  $N + 1$  with  $N$  observed time points. After the hidden vectors of each trend and seasonality are extracted, reconstruct continuous features by adding each hidden vector.

$$\hat{\mathbf{C}}^{N+1} = \hat{\mathbf{C}}_T^{N+1} + \hat{\mathbf{C}}_S^{N+1}, \quad (5)$$

where  $\hat{\mathbf{C}}^{N+1} \in \mathbb{R}^c$  is denoted by a set of  $\{\hat{C}_1, \hat{C}_2, \dots, \hat{C}_c\}^{N+1}$ .

For discrete values, due to the difficulty in explaining trend and seasonality, they are converted into one-hot vectors and used as inputs for a linear layer to extract hidden vectors. The process is as follows:

$$\begin{aligned} \{\mathbf{O}^t\}_{t=1}^N &= \text{One-Hot}(\{\mathbf{D}^t\}_{t=1}^N), \\ \hat{\mathbf{O}}^{N+1} &= \text{Linear}_{discrete}(\{\mathbf{O}^t\}_{t=1}^N), \end{aligned} \quad (6)$$

where One-Hot indicates a one-hot embedding,  $\mathbf{O}^t \in \mathbb{R}^{d \times e}$  is a set of one-hot vectors of discrete columns,  $e$  is an embedding dimension and  $\hat{\mathbf{O}}^{N+1} \in \mathbb{R}^{d \times e}$  denotes a set of predicted one-hot vectors of discrete columns  $\{\hat{O}_1, \hat{O}_2, \dots, \hat{O}_d\}^{N+1}$ . Then,  $\hat{O}_t \in \mathbb{R}^e$  is a predicted one-hot vector of discrete value.  $\text{Linear}_{discrete}$  is a linear layer that predicts the next time point  $N + 1$  with  $N$  observed time points.

## A.2 ADAPTIVE GRAPH CONVOLUTION LAYER.

Second, we utilize an adaptive graph convolution (AGC) layer. The lack of learning dependencies between features due to the separate handling of continuous and discrete values can be addressed by using an adaptive adjacency matrix. The adaptive adjacency matrix is formed by multiplying learnable embedding and is defined as follows:

$$\mathbf{A} = \mathbf{I} + \text{softmax}(\text{ReLU}(\mathbf{E}\mathbf{E}^\top)), \quad (7)$$

where  $\mathbf{E} \in \mathbb{R}^{(c+d) \times b}$  is a trainable node-embedding matrix with embedding dimension  $b$ ,  $\mathbf{I} \in \mathbb{R}^{(c+d) \times (c+d)}$  is the identity matrix, and  $\mathbf{A} \in \mathbb{R}^{(c+d) \times (c+d)}$  is the learned adjacent matrix of the graph representing the proximity between time-series features.

We combine the adaptive adjacency matrix and graph convolution network. To utilize AGC, the one-hot embedding of continuous features and discrete features are concatenated into  $\mathbf{X} \in \mathbb{R}^{(c+d) \times (e \times N)}$ .  $\mathbf{X}$  is reshaped from the  $\{\tilde{\mathbf{C}}^t, \mathbf{O}^t\}_{t=1}^N \in \mathbb{R}^{(c+d) \times e \times N}$ , where  $\tilde{\mathbf{C}}^t = [\mathbf{C}^t, \mathbf{0}] \in \mathbb{R}^{(c+d) \times e}$  is zero-padded continuous features. Let  $\mathbf{H} \in \mathbb{R}^{(c+d) \times h}$  is the matrix of node features with hidden dimension  $h$  transformed by  $\text{Linear}_{input}$ . Then the AGC layer outputs  $\mathbf{Z}$  through the following mapping:

$$\mathbf{X} = \text{reshape}(\{\tilde{\mathbf{C}}^t, \mathbf{O}^t\}_{t=1}^N), \quad (8)$$

$$\mathbf{H} = \text{Linear}_{input}(\mathbf{X}), \quad (9)$$

$$\mathbf{Z} = \sigma(\mathbf{A}\mathbf{H}\mathbf{E}\mathbf{W}), \quad (10)$$

where  $\mathbf{W} \in \mathbb{R}^{b \times h \times e}$  is a trainable weight transformation matrix and  $\sigma(\cdot)$  is the activation function.  $\mathbf{Z} \in \mathbb{R}^{(c+d) \times e}$  is the result of adaptive graph convolution and will be utilized in the prediction stage.

## A.3 PREDICTION.

Finally, the dependencies between features are added to each extracted discrete and continuous hidden vector. Through this, it is possible to make predictions considering the dependence between the separately extracted hidden vectors.

$$\begin{aligned} \hat{\mathbf{C}}^{N+1} &= \hat{\mathbf{C}}^{N+1} + \mathbf{Z}_{:,c,1}, \\ \hat{\mathbf{O}}^{N+1} &= \hat{\mathbf{O}}^{N+1} + \mathbf{Z}_{-d,:}, \end{aligned} \quad (11)$$

where  $\mathbf{Z}_{:,c,1} \in \mathbb{R}^c$  is continuous columns and  $\mathbf{Z}_{-d,:} \in \mathbb{R}^{d \times e}$  is discrete columns in  $\mathbf{Z}$ .

After that, continuous features are trained with the mean square error (MSE) loss as follows:

$$Loss_{\mathbf{C}} = \frac{\sum_{i=1}^c (C_i^{N+1} - \hat{C}_i^{N+1})^2}{c}, \quad (12)$$

where  $C_i^{N+1}$  is the  $i$ -th element of  $\mathbf{C}^{N+1}$ ,  $c$  is the number of continuous elements. For discrete features, we need to train the model with cross-entropy (CE) loss for each discrete feature as follows:

$$Loss_{\mathbf{D}} = \frac{\sum_{i=1}^d \sum_{j=1}^e -O_{ij}^{N+1} \log(\hat{O}_{ij}^{N+1})}{d}, \quad (13)$$

where  $O_{ij}^{N+1}$  is the  $j$ -th one-hot vector element in  $i$ -th one hot vector  $O_i^{N+1}$ .  $e$  is one-hot embedding dimension and  $d$  is the number of discrete elements. The total loss of our prediction model is:

$$Loss_{\text{Total}} = Loss_{\mathbf{C}} + Loss_{\mathbf{D}}. \quad (14)$$

## A.4 TRAINING ALGORITHM

We present the training process of the proposed time-series forecasting model in Algorithm 1. At each iteration, we first divide the continuous and discrete values in the observed time-series  $\mathbf{T}_{train}$ . Each of the continuous values and discrete values is passed through separate prediction models to predict  $\hat{\mathbf{C}}^{N+1}$  and  $\hat{\mathbf{O}}^{N+1}$ . In order to consider the dependency between values regardless of continuous or discrete,  $\mathbf{Z}$  is extracted by passing through the adaptive graph convolution (AGC) layer with the observed time-series  $\mathbf{T}_{train}$  as an input. Then add  $\mathbf{Z}$  to  $\hat{\mathbf{C}}^{N+1}$  and  $\hat{\mathbf{O}}^{N+1}$ . Finally, the prediction model is trained with the mean squared error loss for continuous values and the cross entropy loss for discrete values.

**Algorithm 1:** How to train time-series forecasting model**Input:** training time-series data  $T_{\text{Train}}$ , Iteration number of prediction model  $K_{\text{Pred}}$ **Parameter:** Prediction model  $\theta_{\text{Pred}}$ **Output:** Prediction model  $\theta_{\text{Pred}}$ 

```

1: Initialize  $\theta_{\text{Pred}}$ 
2:  $k \leftarrow 0$ 
3: while  $k < K_{\text{Pred}}$  do
4:    $\{\mathbf{C}^t\}_{t=1}^N, \{\mathbf{D}^t\}_{t=1}^N \leftarrow T_{\text{Train}}$ 
5:    $\{\mathbf{C}_T^t\}_{t=1}^N, \{\mathbf{C}_S^t\}_{t=1}^N \leftarrow \text{Decomp}\{\mathbf{C}^t\}_{t=1}^N$ 
6:    $\hat{\mathbf{C}}_T^{N+1} \leftarrow \text{Linear}_{\text{trend}}(\{\mathbf{C}_T^t\}_{t=1}^N)$ 
7:    $\hat{\mathbf{C}}_S^{N+1} \leftarrow \text{Linear}_{\text{seasonal}}(\{\mathbf{C}_S^t\}_{t=1}^N)$ 
8:    $\hat{\mathbf{C}}^{N+1} \leftarrow \hat{\mathbf{C}}_T^{N+1} + \hat{\mathbf{C}}_S^{N+1}$ 
9:    $\mathbf{O}^{N+1} \leftarrow \text{One-hot}(\{\mathbf{D}^t\}_{t=1}^N)$ 
10:   $\hat{\mathbf{O}}^{N+1} \leftarrow \text{Linear}_{\text{discrete}}(\{\mathbf{O}^t\}_{t=1}^N)$ 
11:   $\mathbf{Z} \leftarrow \text{AGC layer with Eq. 7 to Eq. 10}$ 
12:   $\hat{\mathbf{C}}^{N+1} = \hat{\mathbf{C}}^{N+1} + \mathbf{Z}_{:,c,1}$ 
13:   $\hat{\mathbf{O}}^{N+1} = \hat{\mathbf{O}}^{N+1} + \mathbf{Z}_{-d,:}$ 
14:  if Continuous value then
15:     $Loss_C = \frac{\sum_{i=1}^c (C_i^{N+1} - \hat{C}_i^{N+1})^2}{c}$ 
16:  end if
17:  if Discrete value then
18:     $Loss_D = \frac{\sum_{i=1}^d \sum_{j=1}^e -O_{ij}^{N+1} \log(\hat{O}_{ij}^{N+1})}{d}$ 
19:  end if
20:   $Loss_{\text{Total}} \leftarrow Loss_C + Loss_D$ 
21:  Update  $\theta_{\text{Pred}}$  with  $Loss_{\text{Total}}$ 
22: end while
23: return Prediction model  $\theta_{\text{Pred}}$ 

```

**B EXPERIMENTAL ENVIRONMENTS**

Our detailed software and hardware environments are as follows: UBUNTU 18.04 LTS, PYTHON 3.9.12, CUDA 11.4, NVIDIA Driver 525.125.06 i9 CPU, and GeForce RTX A5000 & A6000.

**B.1 DATASET**

We used four time-series datasets for our experiments. Summary of the datasets in Table A of the main manuscript.

- Mars Science Laboratory rover and Soil Moisture Active Passive satellite (Hundman et al., 2018) datasets are from NASA. Mars Science Laboratory (MSL) rover contains 55 features, consisting of 54 discrete features and 1 continuous feature. The anomaly proportion in MSL testing data is approximately 10.5%. Soil Moisture Active Passive (SMAP) satellite contains 25 features, consisting of 24 discrete features and 1 continuous feature. The anomaly proportion in SMAP testing data is approximately 12.8%.
- Server Machine Dataset (Su et al., 2019) is collected by large internet company. Server Machine Dataset (SMD) has 38 features, two of which are discrete and 36 of which are continuous. The anomaly proportion in SMD testing data is around 4.16%.
- Pooled Server Metrics (Abdulaal et al., 2021) dataset is provided by eBay by capturing internally from application server nodes. Pooled Server Metrics (PSM) contains 25 features with no discrete feature. Among the testing data, the proportion of anomalies is approximately 27.76%.

Table A: Summary of the datasets. Ratio (%) represents the percentage of anomaly in the testing dataset.

| Dataset | Train   | Validation | Test    | # of Cont ( $c$ ) | # of Disc ( $d$ ) | Ratio (%) |
|---------|---------|------------|---------|-------------------|-------------------|-----------|
| MSL     | 46,655  | 11,662     | 73,729  | 1                 | 54                | 10.5      |
| SMAp    | 108,148 | 27,035     | 427,617 | 1                 | 24                | 12.8      |
| SMD     | 566,725 | 141,680    | 708,420 | 36                | 2                 | 4.16      |
| PSM     | 103,289 | 26,495     | 87,841  | 25                | 0                 | 27.76     |

## B.2 BASELINES

To compare the performance of the proposed model, we utilized several prediction-based time-series anomaly detection models and time-series forecasting models as baselines.

- LSTM-P (Malhotra et al., 2015) uses two-layer stacked LSTM network and a fully connected layer for final forecasting.
- DeepAnT (Munir et al., 2018) uses a CNN-based prediction model with two 1D convolution layers and two max pooling, and a fully connected layer.
- TCN-S2S-P (He & Zhao, 2019) applies a temporal convolutional network (TCN) with 1D dilated causal convolutions to time-series anomaly detection.
- MTAD-GAT (Zhao et al., 2020) learns complex dependencies in time-series using two graph attention layers: temporal and feature dimensions.
- GDN (Deng & Hooi, 2021) is a graph-based model that has explainability for anomalies with structure learning and attention weights.
- GTA (Chen et al., 2021) is a transformer-based model that learns a graph structure automatically and takes into consideration the long-term temporal dependencies.
- NLinear and DLinear (Zeng et al., 2023) are linear-based models that utilize temporal information with a linear layer. NLinear utilizes the normalization of time-series data, and DLinear utilizes the decomposition of time-series data.
- TimesNet (Wu et al., 2022) is a Timesblock architecture based model, which incorporates a 2D backbone. It transforms 1D time series into a 2D space and analyzes the resulting 2D tensor using various 2D vision backbones. This allows it to effectively capture intra and interperiodic variations within the time series.
- PatchTST (Nie et al., 2022) is a transformer-based model that uses subseries-level patches of time series as input and has channel independence by processing multivariate time series as a single time series.

## B.3 THRESHOLD MODELS

We provide detailed information about GMM, ECOD, and DeepSVDD used as threshold models.

- GMM is a density-based model that learns the density of the data and identifies points that do not fit well within that density as anomalies. The farther a data point deviates from the distribution, the lower the score it receives through GMM. Consequently, the lowest score value among the training data is used as the threshold.
- ECOD (Li et al., 2022) is a density-based model, which learns the density of the data and considers points located in the both tail parts of the density distribution as anomalies. As a data point gets closer to the tail of the distribution, its score through ECOD tends to be higher. Hence, the threshold in ECOD-based anomaly detection is set to the highest score value among the training data.
- DeepSVDD (Ruff et al., 2018) is a boundary-based model to find the smallest hypersphere that includes the normal data on the latent feature space. If a data point is far outside the learned sphere, its score get higher and then that point will likely be classified to be an anomaly.

Table B: Components of our forecasting model.

| Layer | Design                        | Input size   | Output size  | Layer | Design                     | Input size              | Output size             |
|-------|-------------------------------|--------------|--------------|-------|----------------------------|-------------------------|-------------------------|
| 1     | $\text{Linear}_{trend}$       | $5 \times c$ | $1 \times c$ | 1     | $\text{Linear}_{discrete}$ | $5 \times (d \times e)$ | $1 \times (d \times e)$ |
| 2     | $\text{Linear}_{seasonality}$ | $5 \times c$ | $1 \times c$ |       |                            |                         |                         |

(a) Continuous model.

(b) Discrete model.

| Layer | Design                   | Input size                  | Output size                 |
|-------|--------------------------|-----------------------------|-----------------------------|
| 1     | $\text{Linear}_{input}$  | $(c + d) \times e$          | $h \times (c + d) \times e$ |
| 2     | $\text{Linear}_{output}$ | $h \times (c + d) \times e$ | $1 \times (c + d) \times e$ |
| 3     | squeeze                  | $1 \times (c + d) \times e$ | $(c + d) \times e$          |

(c) Adaptive Graph Convolution Model.

#### B.4 EVALUATION METRICS

To evaluate the time-series anomaly detection performance of our proposed model and baselines, we consider three evaluation metrics as follows:

- F1-@K (Kim et al., 2022) first computes F1-score with the evaluation scheme in which all observations are considered correctly detected if the proportion of correctly detected anomalies in the consecutive anomaly segment exceeds the predefined criterion  $K$ . We use the metric F1-@K as the area under the curve of F1-score where  $K$  varies by 0.1 from 0 to 1 to mitigate the overestimation of point-adjusted F1-score (Xu et al., 2018) and the underestimation of point-wise F1-score.
- F1-Composite (Garg et al., 2022) is calculated as the harmonic mean of point-wise precision and segment-wise recall for robust evaluation of segment-wise anomaly detection.
- F1-Range (Wagner et al., 2023) considers time-series precision and recall with a set of actual anomaly segments and a set of predicted anomaly segments in order to overcome the problem that point-wise F1-score fails to discriminate predictive patterns by ignoring temporal dependencies.

### C DETAILED SETTINGS OF EXPERIMENTS

We introduce the detailed setting of our experiments including model structure and the best hyperparameter. Here, we set the same sliding window size of 5 and prediction horizon length of 1 including baseline models. Additionally, we use the Adam (Kingma & Ba, 2014) optimizer and set the learning rate to 0.005. Our forecasting models include continuous and discrete models, respectively, and an adaptive graph convolution model that extracts dependencies between features. Where  $c$  and  $d$  are the number of continuous and discrete features,  $e$  is the one-hot embedding size of discrete features and  $h$  is the hidden vector of the graph structure (cf. Table B). Finally, we use  $\lambda$  for balancing between continuous features and discrete features in training loss. For each of the reported results, we list the best hyperparameter as follows:

- For MSL,  $c = 1$ ,  $d = 54$ ,  $h = 256$ ,  $e = 2$ ,  $\lambda = 1$ ;
- For SMAP,  $c = 1$ ,  $d = 24$ ,  $h = 256$ ,  $e = 2$ ,  $\lambda = 1$ ;
- For SMD,  $c = 36$ ,  $d = 2$ ,  $h = 256$ ,  $e = 16$ ,  $\lambda = 1$ ;
- For PSM,  $c = 25$ ,  $e = 3$ ,  $h = 256$ ;

### D EXPERIMENT RESULTS

In this section, we present the detailed results of our experiments in Table E to H.

#### D.1 FORECASTING PERFORMANCE

Table D: Mean of evaluation metric and its standard deviation (std). Each value is represented as mean  $\pm$  std. Ground Truth is the result of fitting the testing data to the trained data-driven model. Bold is the most similar performance to Ground Truth.

| Dataset-Data-driven Model                    |           | MSL-GMM                               |                                       |                                       | SMAP-ECOD                             |                                       |                                       | PSM-DeepSVDD                          |                                       |                                       |
|----------------------------------------------|-----------|---------------------------------------|---------------------------------------|---------------------------------------|---------------------------------------|---------------------------------------|---------------------------------------|---------------------------------------|---------------------------------------|---------------------------------------|
| Metric                                       |           | F1-@K                                 | F1-C                                  | F1-R                                  | F1-@K                                 | F1-C                                  | F1-R                                  | F1-@K                                 | F1-C                                  | F1-R                                  |
| Unsupervised<br>Time-series<br>Anomaly Model | LSTM-P    | 0.1906 $\pm$ 0.0000                   | 0.1906 $\pm$ 0.0000                   | 0.1905 $\pm$ 0.0000                   | 0.2031 $\pm$ 0.0146                   | 0.1792 $\pm$ 0.0124                   | 0.1491 $\pm$ 0.0171                   | 0.4571 $\pm$ 0.0031                   | <b>0.4347 <math>\pm</math> 0.0024</b> | 0.4304 $\pm$ 0.0024                   |
|                                              | DeepAnT   | 0.0451 $\pm$ 0.0026                   | <b>0.2179 <math>\pm</math> 0.0323</b> | 0.0404 $\pm$ 0.0284                   | 0.1981 $\pm$ 0.0276                   | 0.2040 $\pm$ 0.0217                   | 0.1669 $\pm$ 0.0163                   | 0.4572 $\pm$ 0.0017                   | 0.4358 $\pm$ 0.0012                   | 0.4316 $\pm$ 0.0014                   |
|                                              | TCN-S2S-P | 0.1906 $\pm$ 0.0000                   | 0.1906 $\pm$ 0.0000                   | 0.1905 $\pm$ 0.0000                   | 0.1284 $\pm$ 0.0143                   | 0.1464 $\pm$ 0.0060                   | 0.0918 $\pm$ 0.0128                   | 0.4505 $\pm$ 0.0033                   | 0.4307 $\pm$ 0.0043                   | 0.4241 $\pm$ 0.0049                   |
|                                              | MTAD-GAT  | 0.1906 $\pm$ 0.0000                   | 0.1906 $\pm$ 0.0000                   | 0.1905 $\pm$ 0.0000                   | 0.1896 $\pm$ 0.0070                   | 0.1749 $\pm$ 0.0050                   | 0.1547 $\pm$ 0.0045                   | 0.4560 $\pm$ 0.0021                   | 0.4308 $\pm$ 0.0041                   | 0.4263 $\pm$ 0.0037                   |
|                                              | GDN       | 0.1906 $\pm$ 0.0000                   | 0.1906 $\pm$ 0.0000                   | 0.1905 $\pm$ 0.0000                   | 0.1351 $\pm$ 0.0082                   | 0.1413 $\pm$ 0.0012                   | 0.0968 $\pm$ 0.0058                   | 0.4601 $\pm$ 0.0090                   | 0.4341 $\pm$ 0.0010                   | 0.4262 $\pm$ 0.0033                   |
|                                              | GTA       | 0.1906 $\pm$ 0.0000                   | 0.1906 $\pm$ 0.0000                   | 0.1905 $\pm$ 0.0000                   | 0.2348 $\pm$ 0.0230                   | 0.2020 $\pm$ 0.0164                   | 0.1731 $\pm$ 0.0159                   | 0.4631 $\pm$ 0.0059                   | 0.4428 $\pm$ 0.0059                   | 0.4357 $\pm$ 0.0065                   |
| Time-series<br>Prediction Model              | NLinear   | 0.2451 $\pm$ 0.0000                   | 0.1996 $\pm$ 0.0000                   | 0.1858 $\pm$ 0.0000                   | 0.0435 $\pm$ 0.0000                   | 0.1989 $\pm$ 0.0001                   | 0.0208 $\pm$ 0.0000                   | <b>0.4458 <math>\pm</math> 0.0001</b> | 0.4332 $\pm$ 0.0001                   | 0.4311 $\pm$ 0.0002                   |
|                                              | DLinear   | 0.1906 $\pm$ 0.0000                   | 0.1906 $\pm$ 0.0000                   | 0.1905 $\pm$ 0.0000                   | 0.0426 $\pm$ 0.0004                   | 0.1990 $\pm$ 0.0055                   | 0.0194 $\pm$ 0.0008                   | 0.4459 $\pm$ 0.0000                   | 0.4331 $\pm$ 0.0001                   | 0.4312 $\pm$ 0.0002                   |
|                                              | TimesNet  | 0.1906 $\pm$ 0.0000                   | 0.1906 $\pm$ 0.0000                   | 0.1905 $\pm$ 0.0000                   | 0.3048 $\pm$ 0.0525                   | <b>0.2684 <math>\pm</math> 0.0484</b> | 0.2153 $\pm$ 0.0389                   | 0.4511 $\pm$ 0.0021                   | 0.4369 $\pm$ 0.0031                   | 0.4337 $\pm$ 0.0028                   |
|                                              | PatchTST  | 0.1906 $\pm$ 0.0000                   | 0.1906 $\pm$ 0.0000                   | 0.1905 $\pm$ 0.0000                   | 0.0423 $\pm$ 0.0006                   | 0.2021 $\pm$ 0.0047                   | 0.0194 $\pm$ 0.0009                   | 0.4459 $\pm$ 0.0001                   | 0.4346 $\pm$ 0.0001                   | <b>0.4326 <math>\pm</math> 0.0002</b> |
| OURS                                         |           | <b>0.0837 <math>\pm</math> 0.0014</b> | 0.1972 $\pm$ 0.0001                   | <b>0.0857 <math>\pm</math> 0.0004</b> | <b>0.0210 <math>\pm</math> 0.0000</b> | 0.1650 $\pm$ 0.0000                   | <b>0.0014 <math>\pm</math> 0.0000</b> | 0.4460 $\pm$ 0.0002                   | 0.4350 $\pm$ 0.0001                   | 0.4331 $\pm$ 0.0001                   |
| Ground Truth                                 |           | 0.0916                                | 0.3428                                | 0.0937                                | 0.0290                                | 0.2908                                | 0.0046                                | 0.4437                                | 0.4347                                | 0.4322                                |

Table C shows the prediction performance of forecasting models. Since existing models consider discrete features as continuous features, our model also treats discrete features as continuous features during the evaluation process and only uses mean square error (MSE).

Evaluating the model only with MSE is disadvantageous to our model, which trained discrete features with cross-entropy (CE) loss. Nonetheless, our forecasting model shows comparable or better performance than the latest time-series forecasting models. Additionally, we will show that evaluating predictive performance using MSE does not guarantee the performance of proactive anomaly detection in the next section.

Table C: Results of forecasting performance on the four benchmark datasets. Each value represents the mean of the evaluation metric and its standard deviation (Std).

| Dataset                  | MSL                                   | SMAP                                  | SMD                                   | PSM                                   |
|--------------------------|---------------------------------------|---------------------------------------|---------------------------------------|---------------------------------------|
| Mean Squared Error (MSE) | Mean $\pm$ Std.                       | Mean $\pm$ Std.                       | Mean $\pm$ Std.                       | Mean $\pm$ Std.                       |
| LSTM-P                   | 1.7052 $\pm$ 0.0348                   | 0.0113 $\pm$ 0.0000                   | 0.0016 $\pm$ 0.0000                   | 0.0020 $\pm$ 0.0001                   |
| DeepAnT                  | 1.2387 $\pm$ 0.9148                   | 0.0314 $\pm$ 0.0105                   | 0.0040 $\pm$ 0.0002                   | 0.0014 $\pm$ 0.0005                   |
| TCN-S2S-P                | 1.0653 $\pm$ 0.1072                   | 0.0926 $\pm$ 0.0092                   | 0.0233 $\pm$ 0.0026                   | 0.0027 $\pm$ 0.0000                   |
| MTAD-GAT                 | 1.8407 $\pm$ 0.0081                   | <b>0.0105 <math>\pm</math> 0.0005</b> | 0.0013 $\pm$ 0.0000                   | 0.0016 $\pm$ 0.0002                   |
| GDN                      | 20.824 $\pm$ 27.073                   | 0.0230 $\pm$ 0.0014                   | 0.0061 $\pm$ 0.0024                   | 0.0015 $\pm$ 0.0003                   |
| GTA                      | 1.8140 $\pm$ 0.0618                   | 0.0370 $\pm$ 0.0062                   | 0.0186 $\pm$ 0.0007                   | 0.0042 $\pm$ 0.0004                   |
| NLinear                  | 0.0671 $\pm$ 0.0001                   | 0.0188 $\pm$ 0.0000                   | 0.0013 $\pm$ 0.0000                   | <b>0.0001 <math>\pm</math> 0.0000</b> |
| DLinear                  | 0.8747 $\pm$ 0.0934                   | 0.0938 $\pm$ 0.0136                   | 0.0013 $\pm$ 0.0000                   | <b>0.0001 <math>\pm</math> 0.0000</b> |
| TimesNet                 | <b>0.0278 <math>\pm</math> 0.0513</b> | <b>0.0044 <math>\pm</math> 0.0004</b> | 0.0014 $\pm$ 0.0001                   | 0.0010 $\pm$ 0.0003                   |
| PatchTST                 | 0.0650 $\pm$ 0.0028                   | 0.0124 $\pm$ 0.0002                   | <b>0.0011 <math>\pm</math> 0.0000</b> | <b>0.0001 <math>\pm</math> 0.0000</b> |
| Ours                     | <b>0.0289 <math>\pm</math> 0.0016</b> | <b>0.0094 <math>\pm</math> 0.0001</b> | <b>0.0013 <math>\pm</math> 0.0000</b> | <b>0.0001 <math>\pm</math> 0.0000</b> |

## D.2 ANOMALY DETECTION PERFORMANCE

Diff represents the difference between the Ground Truth and the result of using the predicted value as an input to the threshold model. The closer to 0, the more similar the prediction to the ground truth value. For models that did not predict well and judged all samples to be anomalies, the Diff value is displayed as -. In some cases, there were models with a lower Diff than our forecasting model, but those models had a much greater variance in forecasting performance than our forecasting model (cf. Table C). Therefore, we can find the anomaly in advance through accurate prediction.

For a detailed comparison, we reported a comprehensive analysis by presenting the mean and standard deviation derived from five repeated experiments in Table D. The ground truth in the last row of Table D is the evaluation of testing data by the data-driven model trained with training data. In other words, if the predicted values of each model are similar to the testing data, they are identical to the ground truth. Therefore, the goal of our experiment is for the evaluation scores of predicted values, as determined by the data-driven model, to closely resemble those of the ground truth values.

When GMM is used as the data-driven model in the MSL dataset (MSL-GMM), our model shows the best anomaly detection performance. In addition, all the models except for DeepAnT, NLinear, and ours, predict all samples as anomalies, showing the same performance. In SMAP-ECOD, our model also shows the best and the most consistent performance. These results also imply that the prediction performance of our model has low variability, as shown in most of the results. In PSM-DeepSVDD, our model does not show the best performance, but the performance difference with the best model is very small, up to 0.0005.

In Table D, our model shows better performance in terms of F1-@K and F1-Range when evaluated on MSL-GMM and SMAP-ECOD. However, it shows worse performance in the F1-Composite. To analyze these differences, we visualize the evaluation of predicted values by a trained data-driven model. Figure A (left) reveals that there is a big difference between the ground truth and predicted values of TimesNet. As a result, TimesNet identifies a majority of the samples as anomalies includ-



ing normal samples within testing data, showing better performance than our model F1-Composite in Table D

Although TimesNet shows better prediction performance in terms of MSE compared to our model, our model shows more similar anomaly scores for each time point than TimesNet. As visualized in the right panel of Figure A, TimesNet produces continuous values for discrete features, while our model predicts properly discrete values. As a result, even though our model shows worse forecasting performance in terms of MSE, our model forecasts values that are more closely aligned with the ground truth compared to other models.

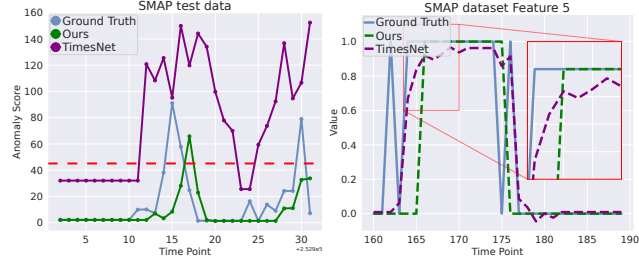

Figure A: Visualization of comparison between ours and TimesNet in the SMAP dataset. *Left*: Anomaly score by the trained ECOD. *Right*: Predicted values for the categorical feature.

Table E: Results of anomaly detection experiment on MSL dataset. When the data-driven model decides all samples to be abnormal, the F1 score is 0.1906.

| Data-driven Model Metrics              | GMM       |               |               |               |               |               | ECOD          |               |               |               |               |               | DeepSVDD      |               |               |               |               |               |
|----------------------------------------|-----------|---------------|---------------|---------------|---------------|---------------|---------------|---------------|---------------|---------------|---------------|---------------|---------------|---------------|---------------|---------------|---------------|---------------|
|                                        | F1-@K     | Diff          | F1-C          | Diff          | F1-R          | Diff          | F1-@K         | Diff          | F1-C          | Diff          | F1-R          | Diff          | F1-@K         | Diff          | F1-C          | Diff          | F1-R          | Diff          |
| Unsupervised Time-series Anomaly Model | LSTM-P    | 0.1906        | -             | 0.1906        | -             | 0.1905        | 0.1906        | -             | 0.1906        | -             | 0.1905        | -             | 0.2026        | 0.0296        | 0.1982        | 0.0511        | 0.1973        | 0.0562        |
|                                        | DeepAnT   | 0.0451        | 0.0465        | <b>0.2179</b> | <b>0.1249</b> | 0.0404        | 0.1906        | -             | 0.1906        | -             | 0.1905        | -             | 0.1906        | 0.0176        | 0.1906        | 0.0435        | 0.1905        | 0.0494        |
|                                        | TCN-S2S-P | 0.1906        | -             | 0.1906        | -             | 0.1905        | 0.1906        | -             | 0.1906        | -             | 0.1905        | -             | 0.1908        | 0.0178        | 0.1908        | 0.0437        | 0.1907        | 0.0496        |
|                                        | MTAD-GAT  | 0.1906        | -             | 0.1906        | -             | 0.1905        | 0.1906        | -             | 0.1906        | -             | 0.1905        | -             | 0.2007        | 0.0277        | <b>0.1846</b> | <b>0.0375</b> | <b>0.1812</b> | <b>0.0401</b> |
|                                        | GDN       | 0.1906        | -             | 0.1906        | -             | 0.1905        | 0.1906        | -             | 0.1906        | -             | 0.1905        | -             | 0.1970        | 0.0240        | 0.1958        | 0.0487        | 0.1953        | 0.0542        |
| Time-series Prediction Model           | GTA       | 0.1906        | -             | 0.1906        | -             | 0.1905        | 0.1906        | -             | 0.1906        | -             | 0.1905        | -             | 0.1913        | 0.0183        | 0.1910        | 0.0439        | 0.1908        | 0.0497        |
|                                        | NLinear   | 0.2451        | 0.1535        | 0.1996        | 0.1432        | 0.1858        | 0.1906        | -             | 0.1906        | -             | 0.1905        | -             | 0.2222        | 0.0492        | 0.2178        | 0.0707        | 0.2150        | 0.0739        |
|                                        | DLinear   | 0.1906        | -             | 0.1906        | -             | 0.1905        | 0.1906        | -             | 0.1906        | -             | 0.1905        | -             | 0.2213        | 0.0483        | 0.2169        | 0.0698        | 0.2142        | 0.0731        |
|                                        | TimesNet  | 0.1906        | -             | 0.1906        | -             | 0.1905        | 0.1906        | -             | 0.1906        | -             | 0.1905        | -             | 0.2048        | 0.0318        | 0.2013        | 0.0542        | 0.2002        | 0.0591        |
|                                        | PatchTST  | 0.1906        | -             | 0.1906        | -             | 0.1905        | 0.1906        | -             | 0.1906        | -             | 0.1905        | -             | 0.2014        | 0.0284        | 0.1996        | 0.0525        | 0.1987        | 0.0576        |
| Ours                                   |           | <b>0.0837</b> | <b>0.0079</b> | 0.1972        | 0.1456        | <b>0.0853</b> | <b>0.2279</b> | <b>0.2136</b> | <b>0.1940</b> | <b>0.0440</b> | <b>0.1774</b> | <b>0.1750</b> | <b>0.1902</b> | <b>0.0172</b> | 0.1870        | 0.0399        | 0.1869        | 0.0458        |
| Ground Truth                           |           | 0.0916        | -             | 0.3428        | -             | 0.0937        | 0.0143        | -             | 0.1500        | -             | 0.0024        | -             | 0.1730        | -             | 0.1471        | -             | 0.1411        | -             |

Table F: Results of anomaly detection experiment on SMAP dataset. When the data-driven model decides all samples to be abnormal, the F1 score is 0.2268.

| Data-driven Model Metrics              | GMM       |               |               |               |               |               | ECOD          |               |               |               |               |               | DeepSVDD      |               |               |               |               |               |
|----------------------------------------|-----------|---------------|---------------|---------------|---------------|---------------|---------------|---------------|---------------|---------------|---------------|---------------|---------------|---------------|---------------|---------------|---------------|---------------|
|                                        | F1-@K     | Diff          | F1-C          | Diff          | F1-R          | Diff          | F1-@K         | Diff          | F1-C          | Diff          | F1-R          | Diff          | F1-@K         | Diff          | F1-C          | Diff          | F1-R          | Diff          |
| Unsupervised Time-series Anomaly Model | LSTM-P    | 0.2269        | 0.1902        | 0.2268        | -             | 0.2268        | 0.2031        | 0.1741        | 0.1792        | 0.1116        | 0.1491        | 0.1445        | 0.2501        | 0.0020        | 0.2393        | 0.0034        | 0.2332        | 0.0032        |
|                                        | DeepAnT   | 0.0001        | 0.0366        | 0.0059        | 0.3126        | 0.0           | 0.1981        | 0.1691        | 0.2040        | 0.0868        | 0.1669        | 0.1623        | 0.2268        | 0.0253        | 0.2268        | 0.0159        | 0.2268        | 0.0096        |
|                                        | TCN-S2S-P | 0.2268        | -             | 0.2268        | -             | 0.2268        | 0.1284        | 0.0994        | 0.1464        | 0.1444        | 0.0918        | 0.0872        | <b>0.2528</b> | <b>0.0007</b> | <b>0.2438</b> | <b>0.0011</b> | <b>0.2374</b> | <b>0.0010</b> |
|                                        | MTAD-GAT  | 0.2281        | 0.1914        | 0.2266        | 0.0919        | 0.2263        | 0.1896        | 0.1606        | 0.1749        | 0.1159        | 0.1547        | 0.1501        | 0.2491        | 0.0030        | 0.2394        | 0.0033        | 0.2334        | 0.0030        |
|                                        | GDN       | 0.2268        | -             | 0.2268        | -             | 0.2268        | 0.1351        | 0.1061        | 0.1413        | 0.1495        | 0.0968        | 0.0922        | 0.2385        | 0.0136        | 0.2319        | 0.0108        | 0.2284        | 0.0080        |
| Time-series Prediction Model           | GTA       | 0.2277        | 0.1910        | 0.2268        | -             | 0.2269        | 0.2348        | 0.2058        | 0.2020        | 0.0888        | 0.1731        | 0.1685        | 0.2717        | 0.0196        | 0.2540        | 0.0113        | 0.2444        | 0.0080        |
|                                        | NLinear   | 0.1373        | 0.1006        | 0.1402        | 0.1783        | 0.0979        | 0.0435        | 0.0145        | 0.1989        | 0.0919        | 0.0208        | 0.0162        | 0.2315        | 0.0206        | 0.2258        | 0.0169        | 0.2229        | 0.0135        |
|                                        | DLinear   | 0.2268        | -             | 0.2268        | -             | 0.2268        | 0.0426        | 0.0136        | 0.1990        | 0.0918        | 0.0194        | 0.2222        | 0.2309        | 0.0212        | 0.2254        | 0.0173        | 0.2225        | 0.0139        |
|                                        | TimesNet  | 0.2358        | 0.1991        | <b>0.2305</b> | <b>0.0880</b> | 0.2273        | 0.3048        | 0.2758        | <b>0.2684</b> | <b>0.0224</b> | 0.2153        | 0.2107        | 0.2495        | 0.0026        | 0.2386        | 0.0041        | 0.2322        | 0.0042        |
|                                        | PatchTST  | 0.2268        | -             | 0.2268        | -             | 0.2268        | 0.0423        | 0.0133        | 0.2021        | 0.0887        | 0.0194        | 0.0148        | 0.2282        | 0.0239        | 0.2234        | 0.0193        | 0.2209        | 0.0155        |
| Ours                                   |           | <b>0.0185</b> | <b>0.0182</b> | 0.2181        | 0.1004        | <b>0.0026</b> | <b>0.0210</b> | <b>0.0080</b> | 0.1650        | 0.1258        | <b>0.0014</b> | <b>0.0032</b> | 0.2416        | 0.0105        | 0.2353        | 0.0074        | 0.2314        | 0.0050        |
| Ground Truth                           |           | 0.0367        | -             | 0.3185        | -             | 0.0078        | 0.0290        | -             | 0.2908        | -             | 0.0046        | -             | 0.2521        | -             | 0.2427        | -             | 0.2364        | -             |

Table G: Results of anomaly detection experiment on SMD dataset. When the data-driven model decides all samples to be abnormal, the F1 score is 0.0806.

| Data-driven Model Metrics              | GMM       |               |               |               |               |               | ECOD   |               |               |               |               |               | DeepSVDD      |               |               |               |               |               |
|----------------------------------------|-----------|---------------|---------------|---------------|---------------|---------------|--------|---------------|---------------|---------------|---------------|---------------|---------------|---------------|---------------|---------------|---------------|---------------|
|                                        | F1-@K     | Diff          | F1-C          | Diff          | F1-R          | Diff          | F1-@K  | Diff          | F1-C          | Diff          | F1-R          | Diff          | F1-@K         | Diff          | F1-C          | Diff          | F1-R          | Diff          |
| Unsupervised Time-series Anomaly Model | LSTM-P    | <b>0.1240</b> | <b>0.0204</b> | 0.1077        | 0.0833        | 0.1050        | 0.1468 | 0.1077        | 0.2125        | 0.1037        | 0.0636        | 0.0526        | 0.0920        | 0.0024        | 0.0763        | 0.0018        | 0.0757        | 0.0016        |
|                                        | DeepAnT   | 0.1131        | 0.0313        | 0.0979        | 0.0931        | 0.0554        | 0.0424 | 0.0033        | 0.0637        | 0.0451        | 0.0124        | 0.0014        | <b>0.0928</b> | <b>0.0016</b> | 0.0754        | 0.0027        | 0.0746        | 0.0027        |
|                                        | TCN-S2S-P | 0.0832        | 0.0612        | 0.0811        | 0.1099        | 0.0809        | 0.0612 | 0.0188        | 0.0612        | 0.0476        | 0.0033        | 0.0077        | 0.0924        | 0.0020        | 0.0766        | 0.0015        | 0.0756        | 0.0017        |
|                                        | MTAD-GAT  | 0.2176        | 0.0732        | 0.1948        | 0.0038        | 0.1662        | 0.1407 | 0.1016        | 0.2046        | 0.0958        | 0.0497        | 0.0387        | 0.0908        | 0.0036        | 0.0743        | 0.0038        | 0.0736        | 0.0037        |
|                                        | GDN       | 0.1180        | 0.0264        | 0.1051        | 0.0859        | 0.1031        | 0.0266 | 0.1259        | 0.2091        | 0.1003        | 0.0726        | 0.0616        | 0.0925        | 0.0019        | <b>0.0777</b> | <b>0.0004</b> | <b>0.0770</b> | <b>0.0003</b> |
| Time-series Prediction Model           | GTA       | 0.1047        | 0.0397        | 0.0845        | 0.1065        | <b>0.0768</b> | 0.0006 | 0.0385        | 0.0011        | 0.1077        | 0.0001        | 0.0109        | 0.0901        | 0.0043        | 0.0757        | 0.0024        | 0.0749        | 0.0024        |
|                                        | NLinear   | 0.1148        | 0.0295        | 0.1208        | 0.0702        | 0.0540        | 0.0427 | 0.0036        | 0.0807        | 0.0281        | 0.0126        | 0.0016        | 0.0918        | 0.0026        | <b>0.0785</b> | <b>0.0004</b> | <b>0.0778</b> | 0.0005        |
|                                        | DLinear   | 0.0917        | 0.0527        | 0.1062        | 0.0848        | 0.0494        | 0.0358 | 0.0033        | 0.0660        | 0.0428        | <b>0.0103</b> | <b>0.0007</b> | 0.0917        | 0.0027        | <b>0.0785</b> | <b>0.0004</b> | 0.0778        | 0.0005        |
|                                        | TimesNet  | 0.1972        | 0.0528        | <b>0.1921</b> | <b>0.0011</b> | 0.1483        | 0.1225 | 0.0834        | 0.2242        | 0.1154        | 0.0581        | 0.0471        | 0.0915        | 0.0029        | 0.0757        | 0.0024        | 0.0751        | 0.0022        |
|                                        | PatchTST  | 0.1190        | 0.0254        | 0.1489        | 0.0421        | 0.0699        | 0.0410 | <b>0.0019</b> | 0.0757        | 0.0331        | 0.0121        | 0.0011        | 0.0910        | 0.0034        | 0.0773        | 0.0008        | 0.0767        | 0.0006        |
| Ours                                   |           | 0.1996        | 0.0552        | 0.2178        | 0.0268        | 0.1278        | 0.0463 | 0.0072        | <b>0.0865</b> | <b>0.0223</b> | 0.0131        | 0.0021        | 0.0924        | 0.0020        | 0.0787        | 0.0006        | 0.0780        | 0.0007        |
| Ground Truth                           |           | 0.1444        | -             | 0.1910        | -             | 0.0765        | 0.0391 | -             | 0.1088        | -             | 0.0110        | -             | 0.0944        | -             | 0.0781        | -             | 0.0773        | -             |

### D.3 ABLATION STUDIES

For more accurate prediction performance, our forecasting model consists of various factors. Among them, the most important factors are graph structure and separate training processes of continuous and discrete features. Therefore, we investigate the role and effectiveness of each component through ablation studies of prediction performance using the SMD dataset.

#### D.3.1 GRAPH STRUCTURE.

Table H: Results of anomaly detection experiment on PSM dataset. When the data-driven model decides all samples to be abnormal, the F1 score is 0.4351.

| Data-driven Model Metrics              |           | GMM           |               |               |               |               |               | ECOD          |               |               |          |               |          | DeepSVDD      |               |               |        |               |               |
|----------------------------------------|-----------|---------------|---------------|---------------|---------------|---------------|---------------|---------------|---------------|---------------|----------|---------------|----------|---------------|---------------|---------------|--------|---------------|---------------|
|                                        |           | F1-@K         | Diff          | F1-C          | Diff          | F1-R          | Diff          | F1-@K         | Diff          | F1-C          | Diff     | F1-R          | Diff     | F1-@K         | Diff          | F1-C          | Diff   | F1-R          | Diff          |
| Unsupervised Time-series Anomaly Model | LSTM-P    | 0.0034        | 0.0452        | 0.0160        | 0.1128        | 0.0007        | 0.0139        | 0.0016        | 0.0228        | 0.0219        | 0.0581   | 0.0013        | 0.0059   | 0.4571        | 0.0134        | <b>0.4347</b> | 0      | 0.4304        | 0.0018        |
|                                        | DeepAnT   | 0.0           | 0.0486        | 0.0           | 0.1288        | 0.0           | 0.0146        | 0.0087        | 0.0157        | 0.0590        | 0.0210   | 0.0057        | 0.0015   | 0.4572        | 0.0135        | 0.4358        | 0.0011 | 0.4316        | 0.0006        |
|                                        | TCN-S2S-P | 0.0           | 0.0486        | 0.0           | 0.1288        | 0.0           | 0.0146        | 0.0           | 0.0244        | 0.0           | 0.0800   | 0.0           | 0.0072   | 0.4505        | 0.0068        | 0.4307        | 0.0040 | 0.4241        | 0.0081        |
|                                        | MTAD-GAT  | 0.0           | 0.0486        | 0.0055        | 0.1233        | 0.0006        | 0.0140        | 0.0090        | 0.0154        | 0.0434        | 0.0366   | 0.0025        | 0.0047   | 0.4560        | 0.0123        | 0.4308        | 0.0039 | 0.4263        | 0.0059        |
|                                        | GDN       | <b>0.0322</b> | <b>0.0164</b> | <b>0.0691</b> | <b>0.0597</b> | <b>0.0163</b> | <b>0.0017</b> | 0.0145        | 0.0099        | 0.0799        | 0.0001   | 0.0080        | 0.0008   | 0.4601        | 0.0164        | 0.4341        | 0.0006 | 0.4262        | 0.0060        |
| Time-series Prediction Model           | GTA       | 0.0           | 0.0486        | 0.0           | 0.1288        | 0.0           | 0.0146        | 0.0005        | 0.0239        | 0.0055        | 0.0745   | 0.0002        | 0.0070   | 0.4631        | 0.0194        | 0.4428        | 0.0081 | 0.4357        | 0.0035        |
|                                        | NLinear   | 0.0250        | 0.0236        | 0.0539        | 0.0749        | 0.0015        | 0.0131        | 0.0241        | 0.0003        | <b>0.0800</b> | <b>0</b> | <b>0.0072</b> | <b>0</b> | <b>0.4458</b> | <b>0.0021</b> | 0.4332        | 0.0015 | 0.4311        | 0.0011        |
|                                        | DLinear   | 0.0181        | 0.0305        | 0.0540        | 0.0747        | 0.0010        | 0.0136        | 0.0239        | 0.0005        | <b>0.0800</b> | <b>0</b> | 0.0069        | 0.0003   | 0.4459        | 0.0022        | 0.4331        | 0.0016 | 0.4312        | 0.0010        |
|                                        | TimesNet  | 0.0537        | 0.0051        | 0.0160        | 0.1128        | 0.0036        | 0.011         | 0.017         | 0.0074        | 0.0642        | 0.0158   | 0.0038        | 0.0034   | 0.4511        | 0.0074        | 0.4369        | 0.0022 | 0.4337        | 0.0015        |
|                                        | PatchTST  | 0.0244        | 0.0242        | 0.0274        | 0.1014        | 0.0006        | 0.0140        | 0.0241        | 0.0003        | <b>0.0800</b> | <b>0</b> | 0.0070        | 0.0002   | 0.4459        | 0.0022        | 0.4346        | 0.0001 | <b>0.4326</b> | <b>0.0004</b> |
| Ours                                   | 0.0244    | 0.0242        | 0.0591        | 0.0697        | 0.0020        | 0.0126        | <b>0.0243</b> | <b>0.0001</b> | <b>0.0800</b> | <b>0</b>      | 0.0073   | 0.0001        | 0.4460   | 0.0023        | 0.4350        | 0.0003        | 0.4331 | 0.0009        |               |
| Ground Truth                           | 0.0486    |               | 0.1288        |               | 0.0146        |               | 0.0244        |               | 0.0800        |               | 0.0072   |               | 0.4437   |               | 0.4347        |               | 0.4322 |               |               |

As mentioned in the proposed method, the graph structure provides dependencies between features in the prediction process. As shown in Figure B, anomaly detection benchmark datasets have a correlation between features. Therefore, the graph structure allows our model to capture correlations for each feature that might not be considered by separate training, which leads to a decrease in overall error for features. Figure C shows that our forecasting model with the graph structure showed lower errors than the model without graph structure in both continuous and discrete features. In other words, it is evident that the graph structure, considering the relationship between each feature, is imperative in anomaly detection datasets with correlations.

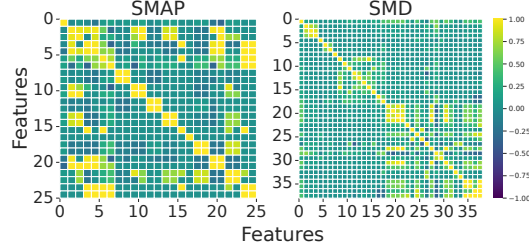

Figure B: Visualization of correlation between each feature. It is closer to a positive (resp. negative) correlation when the color is brighter (resp. darker).

### D.3.2 SEPARATE TRAINING OF CONTINUOUS AND DISCRETE FEATURES.

We split the two groups of features to predict more accurately the time-series datasets for anomaly detection, which include both continuous and discrete features. In this subsection, we investigated the model without separation training to confirm the effectiveness of separation training. In order to implement the model without separation training, discrete features which consist of one-hot vectors (denoted  $\mathbf{O}^t$ ) and continuous features were concatenated to be used as input to the continuous prediction model using a graph structure. In addition, it was trained with the MSE loss.

As a result, Figure C shows that the model without separation training significantly increases the cross-entropy loss compared to our model. In other words, it shows that separation training is necessary for datasets with continuous and discrete features, particularly in multivariate time-series anomaly detection.

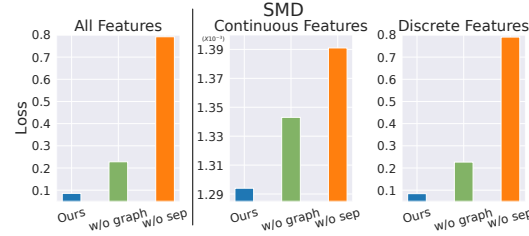

Figure C: Ablation study results for graph structure and separate training of continuous (MSE loss) and discrete (CE loss) features.
